# Supplementary material for: Oleanolic Acid Exerts Osteoprotective Effects and Modulates Vitamin D Metabolism
Source: MDPI journal article supplement (doi:10.3390/nu10020247), 2018-02-22
Supplement: s1 [file s1]

## Supplementary file

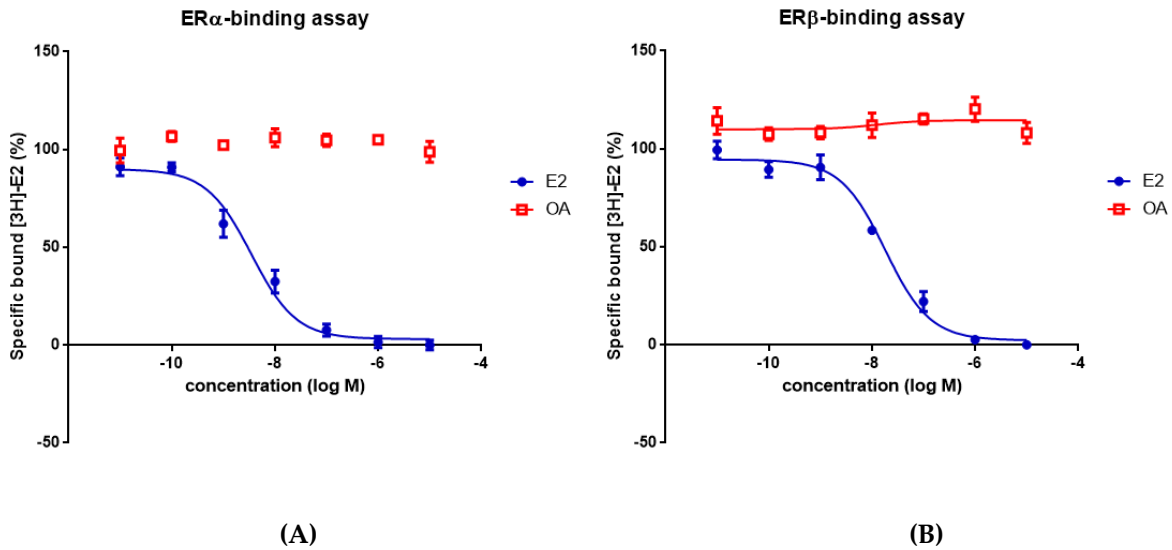

**Figure S1. Competitive ligand binding assays of oleanolic acid for binding to ER $\alpha$  (A) and ER $\beta$  (B).** A concentration gradient of OA ( $10^{-11}$ M to  $10^{-5}$ M) or non-radiolabeled  $17\beta$ -oestradiol ( $10^{-11}$ M to  $10^{-5}$ M) was co-incubated with and  $10^{-8}$ M [ $^3$ H]- $17\beta$ -oestradiol to determine the displacement of specific [ $^3$ H]- $17\beta$ -oestradiol binding to human recombinant full length ER $\alpha$  and ER $\beta$  proteins. Data were presented as percentage specific bound to [ $^3$ H]- $17\beta$ -oestradiol. The figures were obtained from two independent experiments (n=6).
